# Supplementary material for: Chemically-induced cellular stress signals are transmitted to alternative splicing via UsnRNA levels to alter gene expression in Arabidopsis thaliana
Source: Springer Nature journal article supplement (doi:10.1007/s11103-025-01575-9), 2025-03-16
Supplement: MOESM1 [file 11103_2025_1575_MOESM1_ESM.pdf]

# ***FPGS3***

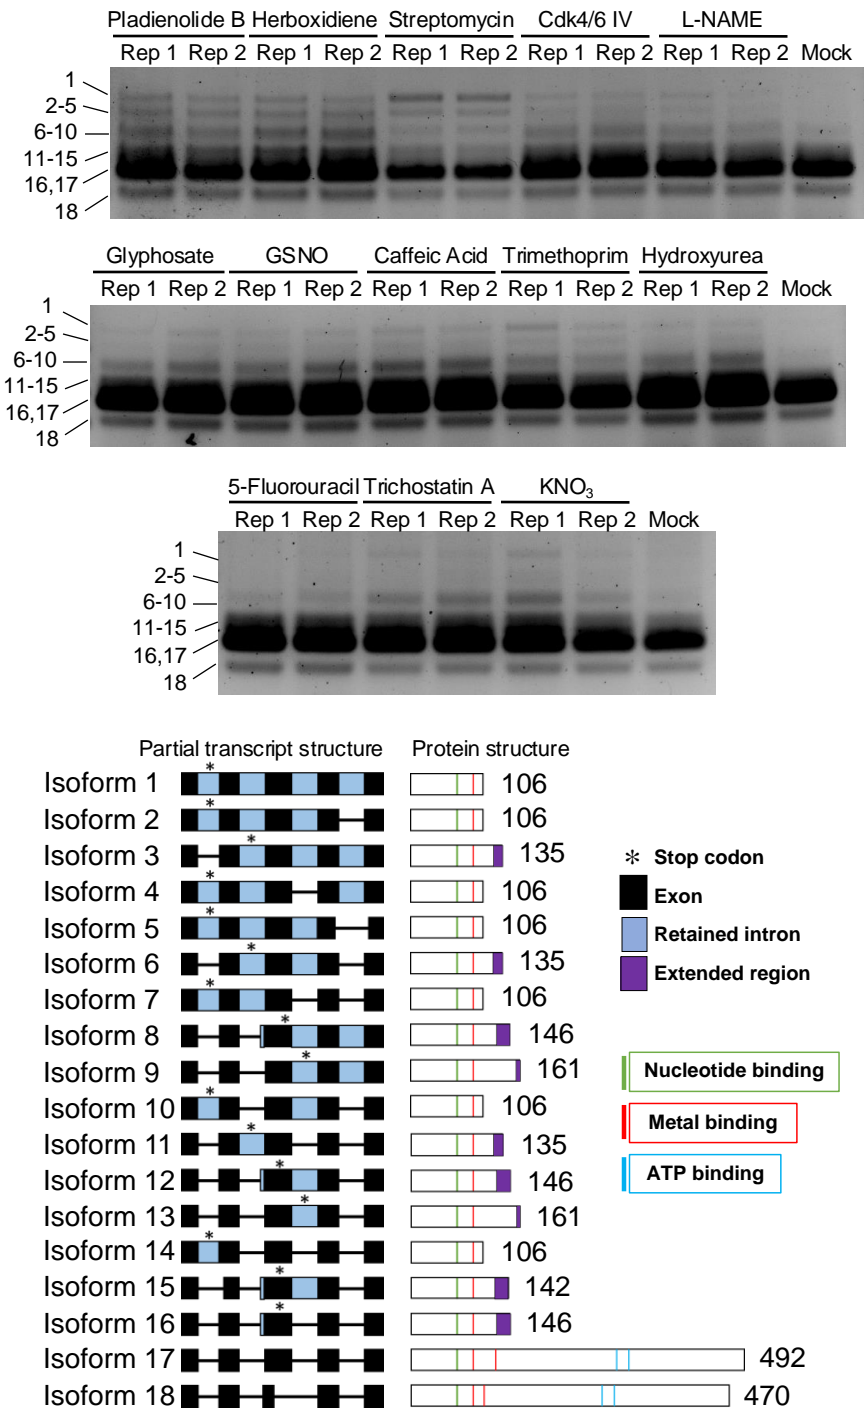

**Fig. S2. AS patterns of *FPGS3* induced by cellular stress.**

Seven-day-old wild-type (Col-0) seedlings were treated with inducers of cellular stress for 24 h and subjected to RT-PCR analysis of *FPGS3* expression. Two replicates (Rep) of the RT-PCR results are shown, and 18 AS isoforms were detected. Partial transcript structures are presented for each AS isoform, showing exons (boxes) and introns (lines), and expected full-length protein structures are shown. Isoform 17 is expected to produce a functional *FPGS3* protein. Black boxes: exons found in isoforms producing functional proteins. Light blue boxes: exonized regions to compare with the isoform 17. Numbers indicate the number of constituent amino acid residues for each isoform protein.

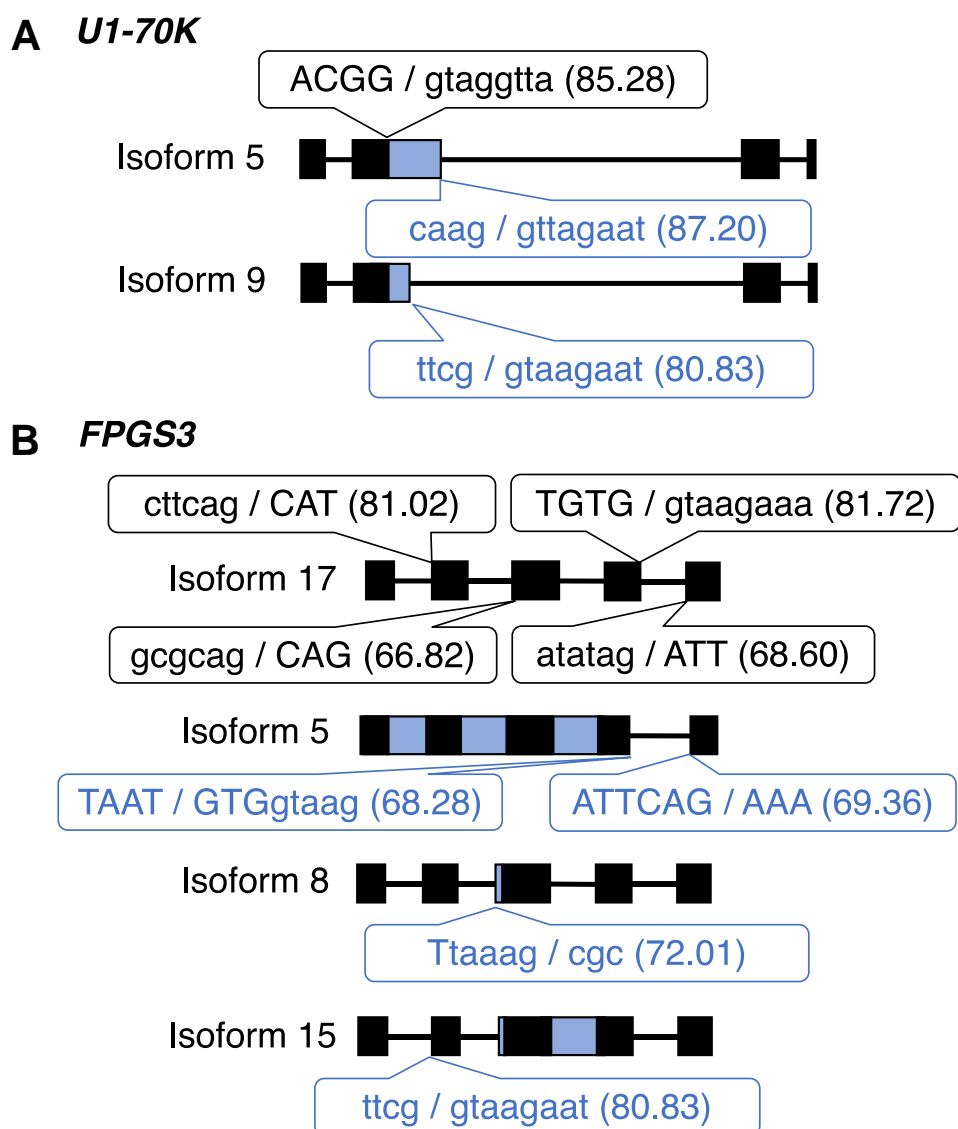

**Fig. S3. Splicing efficiency scores of alternative 5' and 3' splice sites in *U1-70K* and *FPGS3*.**

Alternative 5' and 3' splice sites and their splicing efficiency scores in the **A** *U1-70K* and **B** *FPGS3* AS isoforms. Splicing efficiency scores (%) represent the percentage of similarity to the consensus splice site sequence, as calculated using GENETYX software. Uppercase and lowercase letters indicate sequences corresponding to exons and introns, respectively.

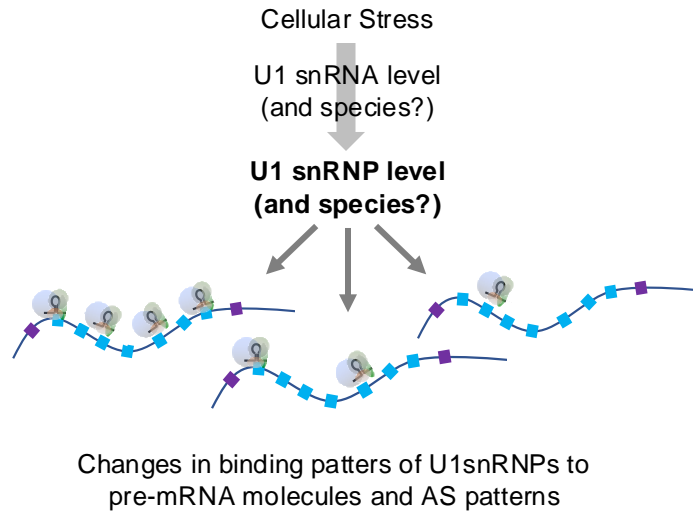

**Fig. S4. Model of the regulatory mechanisms of AS in response to cellular stress.** Cellular stress can alter the amount of U1 snRNA, leading to changes in U1 snRNP levels. U1 snRNA species are also possibly changed. These differential U1 snRNP levels (and/or species) in response to stress influence their recognition of potential splice sites, which can alter the complexity of AS patterns.
